# Supplementary material
Source: Springer Nature journal article supplement (https://www.springermedizin.de/resource/supplementary/12875_2014_1116_MOESM1_ESM.pdf/9435850)
Supplement: MOESM1 [file 9435850]

### List of ATC codes for identifying antibiotic drugs

| Category              | ATC codes                                                                                                  |
|-----------------------|------------------------------------------------------------------------------------------------------------|
| D06A D07B, D07C, D07X | D06AX01<br>D06AX09<br>D06AX13<br>D06BX01<br>D06AA03<br>D07BC01<br>D07CA01<br>D07CC01                       |
| D06BA                 | D06BA01<br>J01XC01                                                                                         |
| G01                   | G01AF01<br>G01AA10                                                                                         |
| J01A                  | J01AA02<br>J01AA04<br>J01AA06<br>J01AA07<br>J01XE01                                                        |
| J01CA                 | J01CA01<br>J01CA02<br>J01CA04<br>J01CA08<br>J01CA11                                                        |
| J01CE                 | J01CE01<br>J01CE02                                                                                         |
| J01CF                 | J01CF01<br>J01CF05                                                                                         |
| J01CR                 | J01CR02                                                                                                    |
| J01E                  | J01EA01<br>J01EB02                                                                                         |
| J01F                  | J01FA01<br>J01FA06<br>J01FA09<br>J01FA10<br>J01FF01                                                        |
| J01M                  | J01MA01<br>J01MA02<br>J01MA14                                                                              |
| S01A og S02A          | S01AB01<br>S01AX06<br>S01AX11<br>S01AX13<br>S01AX19<br>S01AX22<br>S01AA01<br>S01AA12<br>S01AA13<br>S01AA30 |

|                                 |                                                     |
|---------------------------------|-----------------------------------------------------|
|                                 | S02AA15                                             |
| S01C, S02C og S03C              | S01CA01<br>S02CA02<br>S02CA03<br>S03CA01<br>S03CA04 |
| J01DB, J01DC, J01DH<br>og J01GB | J01DB01<br>J01DC02<br>J01DH03<br>J01GB01            |
